# Supplementary material for: Health care costs and resource utilization for different asthma severity stages in Colombia: a claims data analysis
Source: World Allergy Organ J. 2018 Nov 12;11(1):26. doi: 10.1186/s40413-018-0205-4 (PMC6231276; doi:10.1186/s40413-018-0205-4)
Supplement: Supplementary file 1 — Table S1. Asthma medication (DOCX 18 kb) [file 40413_2018_205_MOESM1_ESM.docx]

**Supplementary Table 1.**Asthma medication

| **Controller medications** | **Inhaled corticosteroids** |
| --- | --- |
| Beclometasone |
| Budesonide |
| Ciclesonide |
| Dexamethasone |
| Fluticasone |
| Mometasone |
| **Inhaled corticosteroids /Long acting beta-agonists combination** |
| Fluticasone/Salmeterol |
| Budesonide/Formoterol |
| Mometasone/Formoterol |
| **Leukotriene Modifiers** |
| Montelukast |
| **Theophylliine** |
| **Long-acting beta-agonists** |
| Formoterol |
| Indacaterol |
| Salmeterol |
| **Omalizumab** |
| **Rescue medications** | **Oral/systemic corticosteroids** |
| Betamethasone |
| Dexametasone |
| Hydrocortisone |
| Methylprednisolone |
| Prendisolone |
| Prednisone |
| **Short acting beta-agonists** |
| Epinephrine |
| Levalbuterol |
| Terbutaline |
| Salbutamol |
